# Supplementary material for: Exploring the inverse relationship and differential clinical associations of conditioned pain modulation and offset analgesia in patients with fibromyalgia
Source: Research Square preprint supplement (doi:10.21203/rs.3.rs-6041073/v1), 2025-03-31
Supplement: Supplementary file 1 [file de936522817570fc33b6d733.docx]

### ****Assessment Completion Table for FMS patients****

| **Participant Number** | **OA Completed** | **CPM Completed** | **FIQ Completed** | **McGill Completed** |
| --- | --- | --- | --- | --- |
| **1** | Yes | Yes | Yes | Yes |
| **2** | Yes | Yes | Yes | Yes |
| **3** | Yes | Yes | Yes | Yes |
| **4** | Yes | Yes | Yes | Yes |
| **5** | Yes | Yes | Yes | Yes |
| **6** | Yes | Yes | Yes | Yes |
| **7** | Yes | Yes | Yes | Yes |
| **8** | Yes | Yes | Yes | Yes |
| **9** | Yes | Yes | Yes | Yes |
| **10** | Yes | Yes | Yes | Yes |
| **11** | Yes | Yes | Yes | Yes |
| **12** | Yes | Yes | Yes | Yes |
| **13** | Yes | Yes | Yes | Yes |
| **14** | Yes | Yes | Yes | Yes |
| **15** | Yes | Yes | Yes | Yes |
| **16** | Yes | Yes | Yes | Yes |
| **17** | Yes | Yes | Yes | Yes |
| **18** | Yes | Yes | Yes | Yes |
| **19** | Yes | Yes | Yes | No |
| **20** | Yes | Yes | Yes | No |
| **21** | Yes | Yes | Yes | No |
| **22** | Yes | Yes | Yes | No |
| **23** | Yes | Yes | Yes | No |
| **24** | Yes | Yes | Yes | No |
| **25** | Yes | Yes | Yes | No |
| **26** | Yes | No | Yes | Yes |
| **27** | Yes | No | Yes | Yes |
| **28** | No | Yes | Yes | No |
| **29** | No | Yes | No | No |

Table 2. A detailed explanation of the number of FMS patients who completed each questionnaire and psychophysical tests.
